# Supplementary material
Source: PubMed Central journal article supplement (PMC2453712)
Supplement: 0801017105_0801017105SI.pdf [file 0801017105_0801017105SI.pdf]

# Supporting Information

Wang et al. 10.1073/pnas.0801017105

## SI Materials and Methods

**Plasmid Construction.** *CAGG-PBase* (pCyL43) was constructed as follows: *PBase* was PCR amplified from atub-pBac-K10 (*Drosophila* Genomics Resource Center, Barcode1155) with primers *PBase*-5' (5'-GAT TAA GGA TCC AAA TGG GTA GTT CTT TAG ACG ATG AG-3') and *PBase*-3' (5'-CAT CTA GCG GCC GCA GTC AGA AAC AAC TTT GGC AC-3') and cut with BamHI and NotI. The fragment was ligated into a vector under the control of CAG promoter.

*PB* transposon (pCyL50) was constructed as follows: *PB*-5'*TR* was PCR amplified from (with *Drosophila* Genomics Resource Center, Barcode1156) with *PB*-5'*TR*-5' (5'-GTC TTA GGT ACC TCG CGC GAC TTG GTT TGC-3') and *PB*-5'*TR*-3' (5'-CCA ATT GCT AGC CAA CAA GCT CGT CAT CGC-3') and cut with KpnI-NheI. *PB*-3'*TR* was PCR amplified with *PB*-3'*TR*-5' (5'-CGT ATG CTA GCT TAA TTA ACG AGA GCA TAA TAT TGA TAT-3') and *PB*-3'*TR*-3' (5'-GGA TAT GAG CTC GGT ATT CAC GAC AGC AGG-3') and cut with NheI-SacI. The two fragments were ligated into pBlueScript and an oligo containing *Asc*I was inserted between NheI and SacI.

*PB-PGK-Neo-bpA* was constructed by cloning a *PGK-EM7-Neo-bpA* cassette (1) into pCyL50. Construction of *PB-SB* hybrid transposon was as follows: *SB* 5' LTR was PCR amplified with primers *SB*-5' LTR-F (5'-GCG ATC GCC GAG CTA CAG TTG AAG TCG GAA GTT T-3') and *SB*-5' LTR-R (5'-GGA TCC GGC CGG CCC GGG CCT GCA GGC TAG AGT AAG CTT CTA AAG CCA TGA CAT CAT-3') and cut with *Asi*SI and BamHI. An *Mlu*I-BamHI fragment containing *SB* 3'LTR was cut from pQS67 (Q. Su and P. Liu, unpublished data). The two fragments were ligated into pCyL50 digested with *Asc*I and *Pac*I.

*PB-SB-PGK-Neo-bpA* was constructed by cloning a *PGK-EM7-Neo-bpA* cassette into *PB-SB*. *PB-SB-SA-βgeo* was constructed by cloning a *SA-βgeo* cassette (2) into *PB-SB*. *PB-SB-SAβgeo-PGK-Bsd* was constructed by inserting a *PGK-EM7-Bsd-bpA* cassette (3) into *PB-SB-SA-βgeo*.

The *PGK-[PB-SB-SA-βgeo-PGK-Bsd]-Puro* cassette was con-

structed by inserting the *PB-SB-SA-βgeo-PGK-Bsd* cassette into *PGK-Puro-bpA*. The *Rosa-PGK-[PB-SB-SAβgeo-PGK-Bsd]-Puro* single transposon targeting vector was constructed by cloning the *PGK-[PB-SB-SAβgeo-PGK-Bsd]-Puro* cassette into a *Rosa26* targeting vector with a *MC1-tk* negative selection marker, pL471 (P. Liu, unpublished data). The *Rosa-PBase* transposase targeting vector was constructed by cloning a *SA-PBase-bpA* cassette and a floxed *SA-Neo-bpA* cassette into pL471.

**Cell Transfection.** AB1 and AB2.2 mouse ES cells were cultured as described in ref. 4. AB1 or AB2.2 cells ( $1 \times 10^7$ ) were used for each electroporation. Immediately after electroporation, cells were diluted and seeded onto 6-cm feeder plates. G418 (150  $\mu$ g/ml), puromycin (3  $\mu$ g/ml) or blasticidine (10  $\mu$ g/ml) selection was initiated after 48 h, and continued for 8 days. For each electroporation, diluted cells were also cultured without drug as a control for the plating efficiency. At the end of the selection, surviving colonies were stained by Methylene blue and counted after extensive washing with water.

For gene targeting, 20  $\mu$ g of linearized *Rosa-PGK-[PB-SB-SA-βgeo-PGK-Bsd]-Puro*, *Rosa-PBase* or *Rosa-SB11* targeting vector were electroporated into  $1 \times 10^7$  AB2.2 cells. *Rosa-PBase* and *Rosa-SB11* targeting were selected with 150  $\mu$ g/ml G418 plus 2  $\mu$ M gancyclovir. *Rosa26-PGK-[PB-SB-SA-βgeo-PGK-Bsd]-Puro* targeting was selected with 10  $\mu$ g/ml blasticidine plus 2  $\mu$ M gancyclovir. Correctly targeted clones were screened by long-range PCR using primers *bpA-F* (5'-GAC CCT GGA AGG TGC CAC TCC CAC TG-3') and *Rosa-3'-R* (5'-GCA TCA GGA TAA AGT TCT TGC-3'), and by Southern analysis.

For *Rosa-PBase* and *Rosa-SB11* alleles, the *loxP* glanced selection marker was popped out by transient expression of Cre. 20  $\mu$ g of supercoiled *PGK-Cre-bpA* plasmids were electroporated into  $1 \times 10^7$  *Rosa-PBase* or *Rosa-SB11* cells. After electroporation, diluted cells were seeded onto feeder plates for 10 days. Single colonies were picked and confirmed by drug sib-selection and by Southern analysis.

1. Liu P, Jenkins NA, Copeland NG (2003) *Genome Res* 13:476–484.

2. Zambrowicz BP, et al. (1997) *Proc Natl Acad Sci USA* 94:3789–3794.

3. Liu P, Jenkins NA, Copeland NG (2002) *Nat Genet* 30:66–72.

4. Ramirez-Solis R, Davis AC, Bradley A (1993) *Methods Enzymol* 225:855–878.

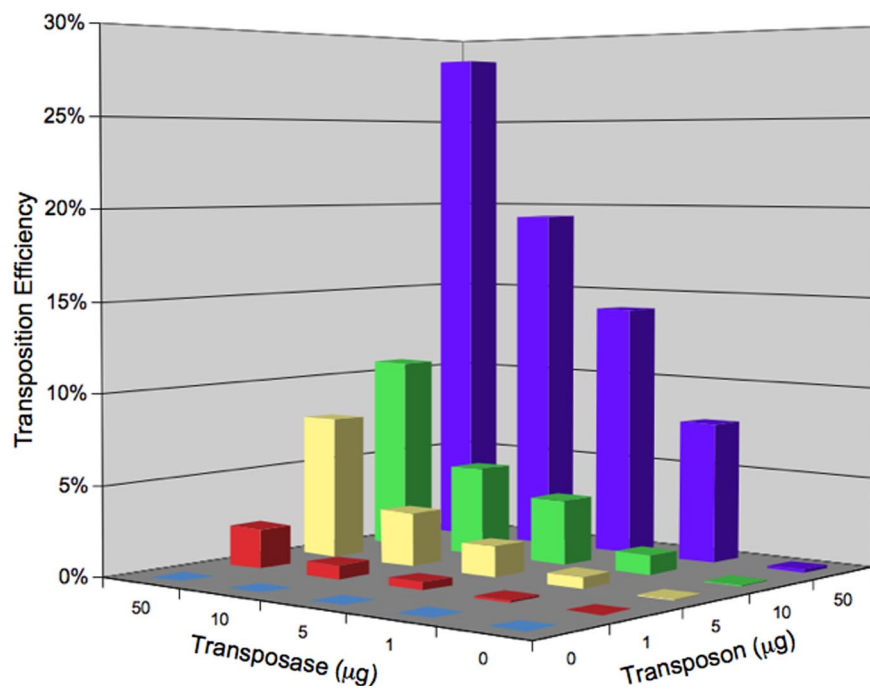

**Fig. S1.** PB transposition in mouse ES cells. Different amounts of CAGG-PBase helper and PB-PGK-Neo-bpA donor plasmids were transfected into ES cells. Transposition efficiency was calculated as the percentage of G418<sup>R</sup> cells versus all of the cells surviving the electroporation. The transposition efficiency of each combination is the average obtained from three independent experiments.

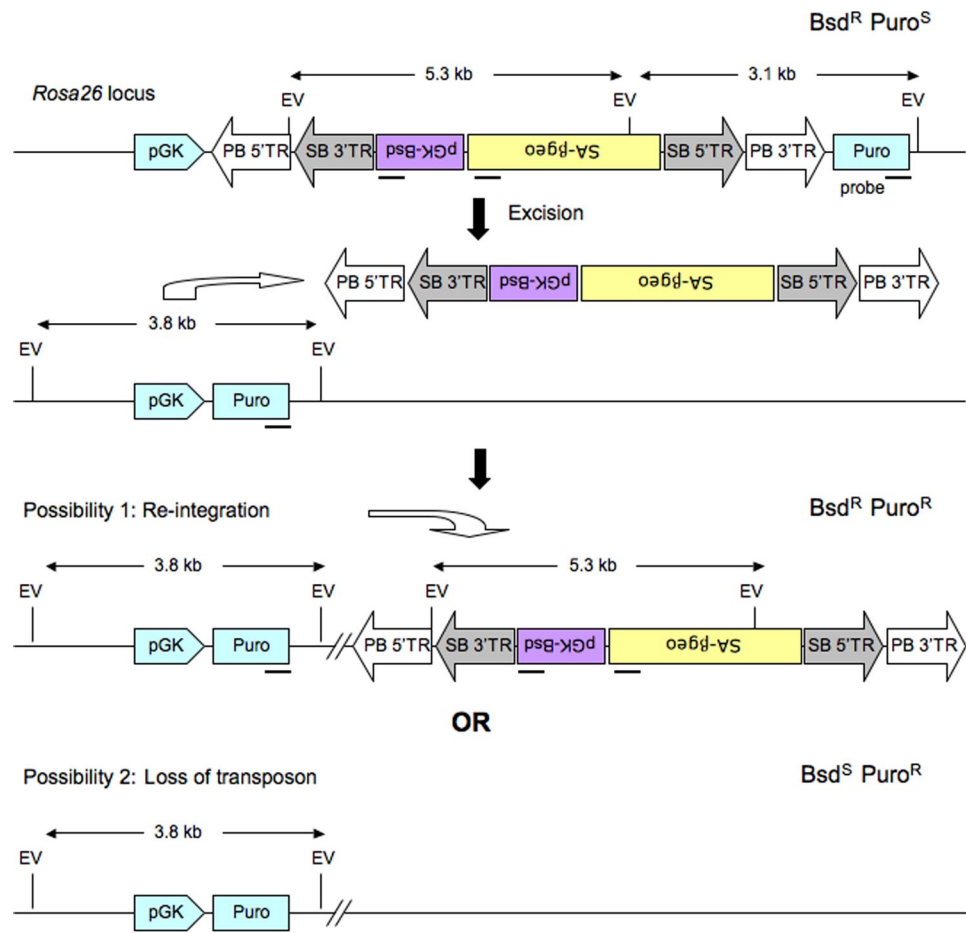

**Fig. S2.** Characterization of PB transposon from *Rosa26* locus by Southern analysis. A *bpA* probe was used to detect excision and reintegration of PB transposon. Three copies of the *bpA* sequence are present both inside and outside the transposon in the targeted cassette, which are in the  $\beta$ geo, Bsd and Puro selection markers, respectively. EcoRV digestion identifies two restriction fragments, 3.1 kb and 5.3 kb, in the transposon targeted clones. When the transposon is mobilized, the 3.1-kb fragment changes to 3.8 kb. If the excised transposon reintegrates into the ES cell genome, the 5.3-kb EcoRV fragment will remain unchanged.



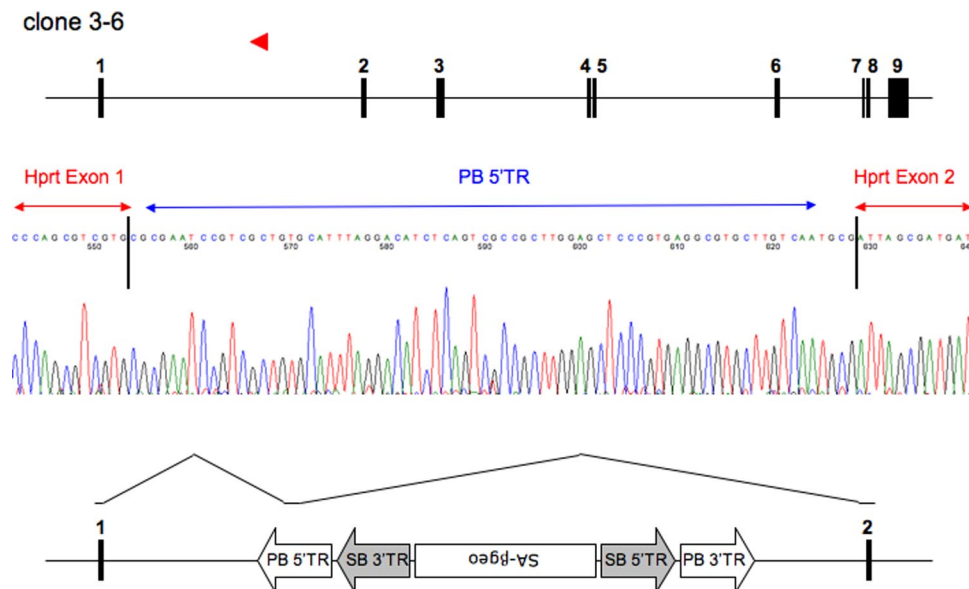

**Fig. S4.** *PB 5'TR* is mutagenic. In one of the 6-TG<sup>R</sup> clones (clone 3–6), *PB* integrates into *Hprt* intron 1 in the opposite direction to the other *PB* integrations shown in Fig. S3. Sequence analysis of the RT-PCR products demonstrated that a 74-bp *PB 5'TR* sequence was inserted in between *Hprt* exons 1 and 2 and caused a frame shift in the *Hprt* fusion transcript. This fusion transcript suggests that *PB 5'TR* contains a pair of cryptic splice acceptor and donor sequences.

**Table S1. Direct comparison of PB and SB transposon systems.**

| Cell line    | Transposon                                       | Average trapping efficiency |
|--------------|--------------------------------------------------|-----------------------------|
| ROSA-SB11 KI | 10 $\mu$ g of methylated PB-SB-SA- $\beta$ geo   | 0.000017 $\pm$ 0.000005     |
| ROSA-SB11 KI | 10 $\mu$ g of unmethylated PB-SB-SA- $\beta$ geo | 0.000002 $\pm$ 0.000000     |
| ROSA-IFP2 KI | 10 $\mu$ g of methylated PB-SB-SA- $\beta$ geo   | 0.000278 $\pm$ 0.000013     |
| ROSA-IFP2 KI | 10 $\mu$ g of unmethylated PB-SB-SA- $\beta$ geo | 0.003275 $\pm$ 0.000338     |
| ROSA-SB11 KI | 1 $\mu$ g of PB-SB-pGK-Neo                       | 0.000027 $\pm$ 0.000005     |
| ROSA-SB11 KI | 10 $\mu$ g of PB-SB-pGK-Neo                      | 0.000253 $\pm$ 0.000020     |
| ROSA-IFP2 KI | 1 $\mu$ g of PB-SB-pGK-Neo                       | 0.035371 $\pm$ 0.002362     |
| ROSA-IFP2 KI | 10 $\mu$ g of PB-SB-pGK-Neo                      | 0.170960 $\pm$ 0.008113     |

## Other Supporting Information Files

[Dataset S1](#)

[Dataset S2](#)

[Dataset S3](#)

[Dataset S4](#)

[Dataset S5](#)

[Dataset S6](#)

[Dataset S7](#)

[Dataset S8](#)
